# Supplementary material for: MiR-195-5p Promotes Cardiomyocyte Hypertrophy by Targeting MFN2 and FBXW7
Source: Hindawi journal article supplement (doi:10.1155/2019/1580982), 2019-06-25
Supplement: f1 [file 1580982.f1.pdf]

**Supplemental Table 1.** Real-time PCR primer sequences

| <b>Gene</b>    | <b>Forward Primer(5'→3')</b> | <b>Reverse Primer(5'→3')</b> |
|----------------|------------------------------|------------------------------|
| Mouse-ANP      | TCCTCGTCTTGGCCTTTTG          | CTCATCTTCTACCGGCATCTTC       |
| Mouse-BNP      | GAGACCTCAAATTCOAAGG          | TCTTTCTGCCTTGTGAAGG          |
| Mouse-ACTIN    | CTGTCCCTGTATGCCTCTG          | ATGTCACGCACGATTTCC           |
| Mouse-U6       | GCTTCGGCAGCACATATACTAA       | AACGCTTCACGAATTTGCGT         |
| Rat-ANP        | CTCCGATAGATCTGCCCTCTTG       | GGTACCGGAAGCTGTTGCAGC        |
| Rat-BNP        | TGATTCTGCTCCTGCTTTTC         | GTGGATTGTTCTGGAGACTG         |
| Rat-ACTIN      | CCCATCTATGAGGGTTACGC         | TTAATGTCACGCACGATTTCC        |
| Rat-U6         | GCTTCGGCAGCACATATACTAAAAT    | CGCTTCACGAATTTGCGTGTGCAT     |
| Rat-Btg2       | TCAAGGTTTTTCAGTAGGGCG        | TGTGGTTGATGCGGATACAG         |
| Rat-Sox6       | CCTCACACATAAGCCTGAC          | TTCAGCGTATCCACCACATC         |
| Rat-Sesn1      | GGACGGGCTTTCAAATGGTG         | CCGCTTCTCTCTCTCACGTC         |
| Rat-Dyrk2      | AGTTCGCCCCTCCATTCTG          | CTCCGACCCTGCTGCTTTAA         |
| Rat-Fbxw7      | TATTGAGACCGGCCAGTGTT         | GCTCCACTAACAACCCTCCT         |
| Rat-Jarid2     | ACTGCCAGTACCTGCTTTCC         | TGGTGGTCGTTCTCTGTGTG         |
| Rat-Lats2      | GGACCCCAGGAATGAGCAAA         | TGGTGGGATGGGAATGCTTC         |
| Rat-Mfn2       | CTCTGTGCTGGTTGACGAGT         | AGCGGTCAGACATGTTTCGT         |
| Mmu-miR-195-3p | GGCCAATATTGGCTGTGC           | GAGAGGAGAGGAAGAGGGAA         |
| Mmu-miR-195-5p | AGGGTAGCAGCACAGAAAT          | TTGGGAGGTAGGAGGTTGAT         |
| Rno-miR-195-3p | CGTTATCCTAGCAGCACAGAAAT      | TATGGTTTTGACGACTGTGTGAT      |
| Rno-miR-195-5p | TCTCGCCCAATATTGGCTG          | TATGGTTGTTTCACGACTCCTTCAC    |
